# Supplementary material for: The control of acidity in tumor cells: a biophysical model
Source: PubMed Central journal article supplement (PMC7423962; doi:10.1038/s41598-020-70396-1), 2020-08-12
Supplement: 41598_2020_70396_MOESM1_ESM.pdf [file 41598_2020_70396_MOESM1_ESM.pdf]

# Supplementary Material

## The control of acidity in tumor cells: a biophysical model

N. Piasentin<sup>4,1</sup>, E. Milotti<sup>2</sup>, and R. Chignola<sup>3,\*</sup>

<sup>1,2</sup>Department of Physics, University of Trieste, Via Valerio 2, I-34127 Trieste, Italy

<sup>3</sup>Department of Biotechnology, University of Verona, Strada Le Grazie 15 - CV1, I-37134 Verona, Italy

In this document we detail the estimates of model parameters whenever not specified in the main text. In the Appendix we list the C++ code used for the simulations described in the Results section in the main text.

### Rates of H<sup>+</sup> and CO<sub>2</sub> production

The rates of H<sup>+</sup> and CO<sub>2</sub> production are obtained from the metabolic model described in refs. (1, 2). To compute the rate of H<sup>+</sup> production by tumor cells we take into account the previously determined average rate of lactic acid production  $g_{AcL} \approx 3.8 \cdot 10^{-19}$  kg s<sup>-1</sup> (1). Under physiological conditions this acid completely dissociates to H<sup>+</sup> and lactate ions (2). Since these chemical species are in 1:1 molar ratio, the rate of H<sup>+</sup> production  $g_H$  simply writes:

$$g_H = g_{AcL} \frac{MW_H}{MW_{AcL}}$$

where  $MW_H = 1$  g mol<sup>-1</sup> and  $MW_{AcL} = 90$  g mol<sup>-1</sup> are the molecular weights of H<sup>+</sup> and lactic acid.

Complete glucose oxidation requires 6 moles of O<sub>2</sub> per mole of glucose and in this reaction 6 moles of CO<sub>2</sub> are produced. Thus, if the respective rates of O<sub>2</sub> consumption and CO<sub>2</sub> production are  $q_{O_2}$  and  $g_{CO_2}$ , we find:

$$g_{CO_2} = q_{O_2} \frac{MW_{CO_2}}{MW_{O_2}}$$

where  $MW_{O_2} = 32$  g mol<sup>-1</sup> and  $MW_{CO_2} = 44$  g mol<sup>-1</sup> are the molecular weights of O<sub>2</sub> and CO<sub>2</sub>. Our previous work showed that for tumor cells on average  $q_{O_2} \approx 3.5 \cdot 10^{-20}$  kg s<sup>-1</sup>.

### Determination of parameters' values for NHE transporters

At least three independent experimental works confirmed that the activity of NHE transporters is described by a Hill equation (see also the main text) with exponent  $> 2$  (3–5). In addition it has been reported that H<sup>+</sup> transport by NHE is inhibited by extracellular acidity (3).

To determine the values of parameters in equations that describe NHE transporters and their regulation by extracellular acidity we used the data in Fig.1, panel Ei, in ref. (3). The data have been obtained with careful measurements of H<sup>+</sup> fluxes in HCT116 cells (a human colorectal cancer cell line) with varying intracellular (pH<sub>i</sub>) and extracellular (pH<sub>e</sub>) pH. We redraw these data in figure S1.

We fitted these data with the following Hill equation:

$$\frac{dm_{H^+,C}}{dt} = V_{max} \cdot \frac{[H^+]_C^h}{K_m^h + [H^+]_C^h} \quad (1)$$

where square brackets denote molar concentrations, the subscript  $C$  is used for intracellular chemical species,  $V_{max}$  and  $K_m$  are the Michealis-Menten parameters and  $h$  is the Hill coefficient. Nonlinear fits were weighted with experimental errors and we used the  $\chi^2/df$  statistics ( $df$ =degrees of freedom) to determine the goodness of the fits.

Best fit parameters values are listed in table S1. We take the average value of both  $K_m$  and  $h$  parameters calculated from the values shown in table S1, i.e.  $K_m = 0.1958 \pm 0.0124$   $\mu$ M and  $h = 2.67 \pm 0.15$ , and the value of  $V_{max}$  estimated at  $pH_e = 7.4$ . We compute the maximum ion flux per surface unit as  $V_{max}/S_C$  where  $S_C$  is the cell surface. The reported radius of HCT116 cells is  $r_C = 6.55 \pm 0.14$   $\mu$ m (3). We approximate the cell to a sphere and finally obtain the  $V_{maxNHE}$  value reported in Table 1 in the main text.

<sup>4</sup>current address: Department of Chemical and Process Engineering, University of Surrey, GU2 7XH, and Unilever R&D Colworth, Colworth Park, Sharnbrook, Bedford MK44 1LQ, UK.

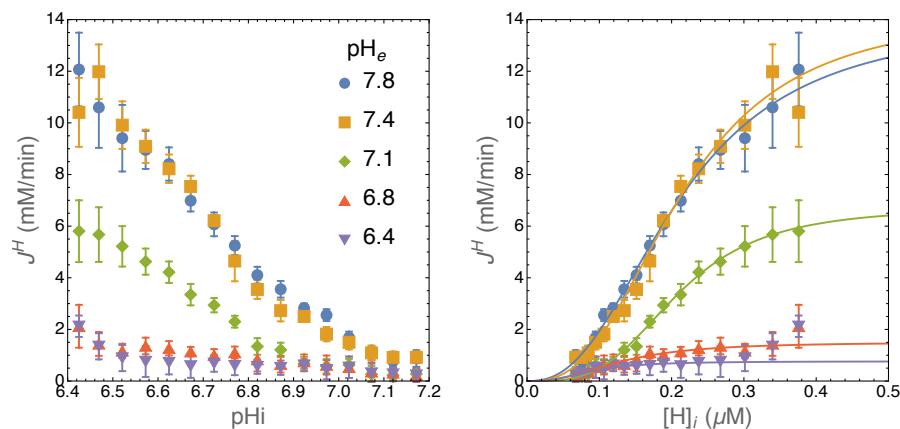

Figure S1: Fit of experimental data with equation 1. Left panel: the data taken in measurements of  $H^+$  fluxes in HCT116 cells with varying  $pH_i$  and  $pH_e$ , redrawn from ref. (3). Right panel: same data as in the left panel, but in this case the x-axis has been converted from  $pH_i$  to intracellular  $H^+$  concentration units. The lines show the best fits with the nonlinear Hill equation 1.

Table S1: Parameter values from nonlinear fits of the data in figure S1 with equation 1

| $pH_e$ | $V_{max}(mM/min)$ | $K_m(\mu M)$        | $h$             | $\chi^2/df$ |
|--------|-------------------|---------------------|-----------------|-------------|
| 7.8    | $13.99 \pm 2.18$  | $0.2096 \pm 0.0277$ | $2.47 \pm 0.25$ | 1.22        |
| 7.4    | $14.31 \pm 1.70$  | $0.2123 \pm 0.0199$ | $2.71 \pm 0.22$ | 1.24        |
| 7.1    | $6.73 \pm 1.18$   | $0.2086 \pm 0.0242$ | $3.44 \pm 0.53$ | 1.20        |
| 6.8    | $1.51 \pm 0.46$   | $0.1297 \pm 0.0438$ | $2.43 \pm 1.30$ | 1.24        |
| 6.4    | $0.76 \pm 0.42$   | $0.0898 \pm 0.0473$ | $2.68 \pm 3.81$ | 1.32        |

To show how the  $V_{max}$  of NHE transporters varies with  $pH_e$  we plot the values listed in table S1 in figure S2.  $V_{max}$  values were divided by the maximum observed value (i.e.  $V_{max}$  estimated at  $pH_e=7.4$ ) and then fitted with the following equation:

$$fpHe = \frac{1}{2} \left( 1 + \frac{pHe - pH_0}{\lambda + |pHe - pH_0|} \right) \quad (2)$$

Equation 2 describe how extracellular pH affects the activity of NHE transporters by reducing the maximal rate of  $H^+$  transport by the fraction  $fpHe$ . Fit of the values in figure S2 with equation 2 yielded the following values for estimated parameters ( $\chi^2/df = 1.85$ ):  $pH_{0,NHE} = 7.10 \pm 0.01$ ,  $\lambda_{NHE} = 0.0759 \pm 0.0258$ .

### Determination of parameters' values for THCO3 transporters

We used the data in Fig.2 in (6) which show the dependence of proton fluxes in MGH U1 cells (a human bladder carcinoma cell line) on the extracellular concentration of bicarbonate ions. In these experiments the flux of protons is defined as the time variation of the product of  $pH_i$  and the buffering capacity of the cells (6). The data follow the Michaelis-Menten kinetics and thus:

$$\frac{dm_{H^+,C}}{dt} = V_{max,H} \cdot \frac{[HCO_3^-]_c}{K_m + [HCO_3^-]_c} \quad (3)$$

where, as usual, the square brackets denote molar concentrations and where the subscript  $C$  denotes the intracellular environment and  $c$  the extracellular one. Fitting the experimental data with equation 3 we find the following values for the Michaelis-Menten parameters ( $\chi^2/df = 1.47$ , see figure S3):  $V_{max,H} = 9.12 \pm 0.41$  mM/min,  $K_m = 7.38 \pm 0.77$  mM. A fit of the same data with a Hill equation returned a value of  $0.94 \pm 0.09$ , i.e.  $\approx 1$ , for the exponent, further indicating that the activity of bicarbonate transporters is not governed by Hill kinetics.

Equation 3 is rather unusual because it relates two different quantities, namely the molar concentrations of protons and of bicarbonate ions. Recalling that for a generic chemical species the molar concentration is related to mass by  $[X] = m_X / (V \cdot MW_X)$

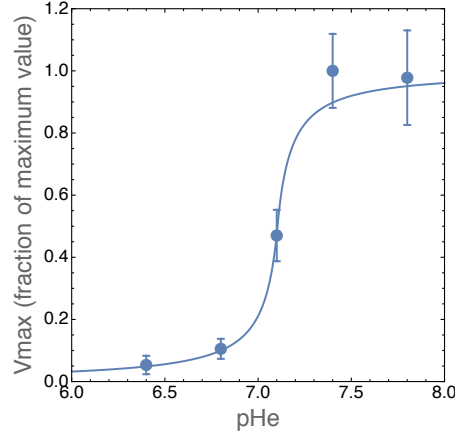

Figure S2: Plot of  $V_{\max}$  values in table S1 (normalized with respect to the maximum reported value) as the function of extracellular pH. The line is the best fit with equation 2.

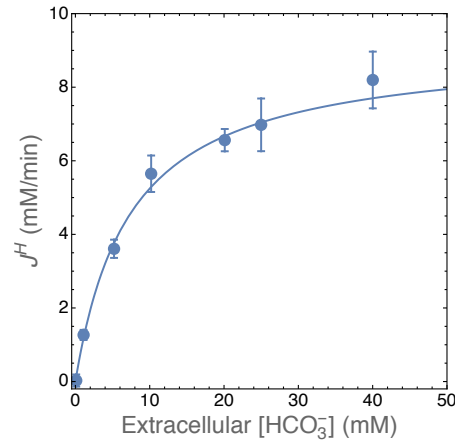

Figure S3:  $H^+$  cell fluxes in MGH U1 cells as the function of extracellular concentration of  $HCO_3^-$  ions. Data have been redrawn from ref. (6). The line shows the best fit of experimental data with equation 3.

where  $V$  is the volume of the solution, then the left-hand side of equation 3 can be written as:

$$(MW_H \cdot V_C) \times \frac{d[H^+]_C}{dt} = \frac{dm_{H^+,C}}{dt}$$

Thus:

$$\begin{aligned} \frac{dm_{H^+,C}}{dt} &= MW_H \cdot V_C \cdot V_{\max,H} \cdot \frac{[HCO_3^-]_c}{K_m + [HCO_3^-]_c} \\ &= MW_H \cdot V_C \cdot V_{\max,H} \cdot \frac{m_{HCO_3^-,c}}{V_c \cdot MW_{HCO_3}} \cdot \frac{1}{K_m + \frac{m_{HCO_3^-,c}}{V_c \cdot MW_{HCO_3}}} \\ &= MW_H \cdot V_C \cdot V_{\max,H} \cdot \frac{m_{HCO_3^-,c}}{K_m \cdot V_c \cdot MW_{HCO_3} + m_{HCO_3^-,c}} \end{aligned}$$

Finally, to convert the  $H^+$  mass into equivalent of  $HCO_3^-$  mass we multiply both sides by the molar mass ratio  $MW_{HCO_3}/MW_H$  and obtain:

$$\frac{dm_{\text{HCO}_3^-,c}}{dt} = \frac{v_{\text{maxTHCO}_3} \cdot m_{\text{HCO}_3^-,c}}{K_{\text{mTHCO}_3} \cdot V_c \cdot \text{MW}_{\text{HCO}_3} + m_{\text{HCO}_3^-,c}}$$

where  $v_{\text{maxTHCO}_3} = \text{MW}_{\text{HCO}_3} \cdot V_c \cdot V_{\text{max,H}}$  and  $K_{\text{mTHCO}_3} = K_{\text{m}}$ . Using the previously estimated value of  $V_{\text{max,H}}$ , we find  $v_{\text{maxTHCO}_3} = 10.91 \cdot 10^{-3} \text{ pg s}^{-1}$ . To obtain the maximum flux per surface unit we divide this value by the cell surface (we consider a cell radius  $r_C = 6.55 \text{ }\mu\text{m}$  as in the previous section) so that, at the very end,  $v_{\text{maxTHCO}_3} = V_{\text{maxTHCO}_3} \cdot S_C$  and  $V_{\text{maxTHCO}_3} = 2.024 \cdot 10^{-5} \text{ pg s}^{-1} \mu\text{m}^{-2}$ .

It is known that the activity of bicarbonate transporters is regulated both by the intracellular and by the extracellular acidity (3, 7). To describe how bicarbonate fluxes depend upon  $\text{pH}_i$  we use the data in Fig. 1, panel Biii, in ref. (7), while we use the data in Fig. 2D in ref. (3) to investigate how transport is affected by  $\text{pH}_e$ . The data were obtained by measuring proton fluxes in presence or in absence of the bicarbonate buffer. As explained in ref. (7), in the absence of the bicarbonate buffer only proton transporters are active, while in its presence both proton and bicarbonate transporters are active. The activity of THCO3 was then calculated by subtraction of these data.

As discussed in the main text we model this part with the following functions:

$$\text{fpH}_i_{\text{THCO}_3} = \frac{1}{2} \{1 + \tanh [\gamma_{\text{THCO}_3} \cdot (\text{pH}_{i,0,\text{THCO}_3} - \text{pH}_i)]\} \quad (4)$$

$$\text{fpH}_e_{\text{THCO}_3} = \frac{1}{2} \{1 + \tanh [\lambda_{\text{THCO}_3} \cdot (\text{pH}_e - \text{pH}_{e,0,\text{THCO}_3})]\} \quad (5)$$

We fit these nonlinear equations to experimental data and the results are shown in figures S4. Since experimental errors were not reported along with the original data the goodness-of-fit statistics cannot be computed for these fits. The fits returned the following best values for the parameters:  $\gamma_{\text{THCO}_3} = 4.2 \pm 0.72$ ,  $\text{pH}_{i,0,\text{THCO}_3} = 6.9 \pm 0.02$ ,  $\lambda_{\text{THCO}_3} = 1.63 \pm 0.22$ ,  $\text{pH}_{e,0,\text{THCO}_3} = 6.85 \pm 0.04$ .

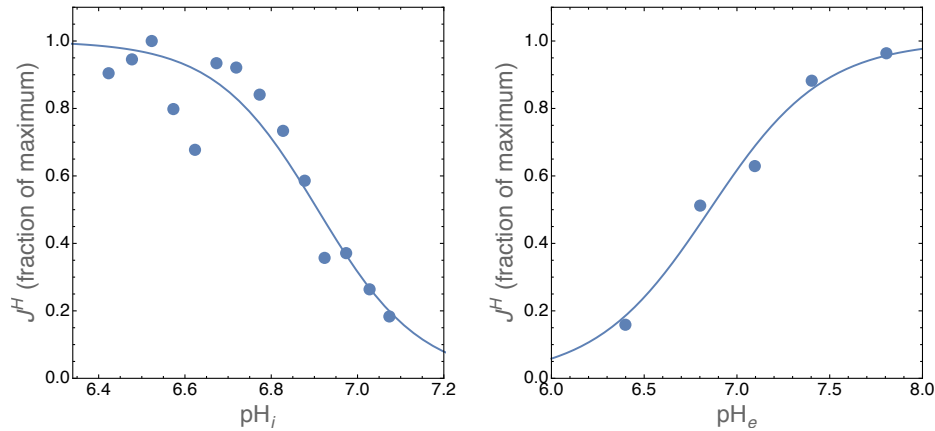

Figure S4: Activity of THCO3 transporters vs. extracellular and intracellular pH. Left panel: Symbols: data redrawn from ref. (7) and normalized with respect to the maximum observed value of  $J^H$ . Line: fit of experimental data with equation 4. Right panel: Symbols: data redrawn from ref. (3). The maximum flux  $J^H$  in this case was estimated by fit of raw data with a logistic equation. Line: fit of experimental data with equation 5.

## The enzymatic activity of CA9

The enzyme CA9 follows the Michaelis-Menten kinetics. CA9 activity was measured by Li et al. (8) in experiments carried out with human breast cancer cells. They report the following values:

- initial CA9 concentration  $[\text{CA9}]_0 = 1.3 \text{ nM}$ ;
- $k_{\text{cat}}/K_{\text{m}} = 62 \pm 5 \text{ }\mu\text{M}^{-1} \text{ s}^{-1}$ ;

- reaction volume = 2 ml
- cell density =  $5 \cdot 10^5$  cells/ml.

Using these values we calculated the Michaelis-Menten parameter  $V_{\max} = 0.58 \text{ mM s}^{-1}$  per cell. This value was then converted to  $\text{CO}_2$  mass units and divided by the cell surface assuming a cell radius of  $6.55 \mu\text{m}$  to obtain the value listed in Table 1 of the main text. The data in Tab.1 in ref. (9) show that the  $K_m$  of the CA9 kinetics varies between 6.9 to 7.5 mM when measured in different experimental conditions, and we choose to take the average value of  $K_m = 7.2 \text{ mM}$ .

CA9 expression in cells depends on the environmental oxygen concentration. Wykoff et al. (10) measured its expression in A549 cells (a human lung carcinoma cell line) grown in normoxic (i.e. 20%  $\text{O}_2$ ) or hypoxic environments by western-blot. We measured the density of the bands in western-blot experiments shown in Fig.3B of their paper (10) using the open-source image processing software ImageJ (version: 2.00-rc-69/1.52r) and the results are shown in figure S5.

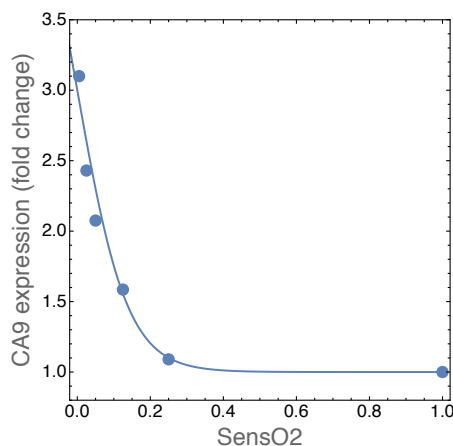

Figure S5: Expression of CA9 in cells grown under normoxic or hypoxic conditions. We used the software ImageJ to measure the density of the bands in western blots shown in Fig.3B in ref. (10). The results are expressed as fold-change expression with respect to CA9 protein band density observed for cells grown in a normoxic atmosphere (i.e. 20%  $\text{O}_2$ ). The x-axis shows the fraction of oxygen to which the cells were exposed. This fraction corresponds to the parameter SensO2 in our model (see the main text). The data were fitted with equation 6 (line)

We fit the data with the following equation:

$$h_{\text{CA9}} = 3 + 2 \cdot \tanh(-\delta_{\text{CA9}} \cdot \text{SensO2}) \quad (6)$$

and obtain  $\delta_{\text{CA9}} \approx 7.3$ .

## REFERENCES

1. Chignola, R., and E. Milotti, 2005. A phenomenological approach to the simulation of metabolism and proliferation dynamics of large tumour cell populations. *Physical Biology* 2:8–22.
2. Chignola, R., A. Delfabbro, C. Dalla Pellegrina, and E. Milotti, 2007. *Ab initio* phenomenological simulation of the growth of large tumor cell populations. *Physical Biology* 4:114–133.
3. Hulikova, A., R. D. Vaughan-Jones, and P. Swietach, 2011. Dual role of  $\text{CO}_2/\text{HCO}_3^-$  buffer in the regulation of intracellular pH of three-dimensional tumor growths. *Journal of Biological Chemistry* 286:13815–13826.
4. Luo, J., D. B. Kintner, G. E. Shull, and D. Sun, 2007. ERK1/2-p90RSK-mediated phosphorylation of  $\text{Na}^+/\text{H}^+$  exchanger isoform 1 A role in ischemic neuronal death. *Journal of Biological Chemistry* 282:28274–28284.
5. Jandeleit-Dahm, K., K. M. Hannan, C. A. Farrelly, T. J. Allen, J. R. Rumble, R. E. Gilbert, M. E. Cooper, and P. J. Little, 2000. Diabetes-induced vascular hypertrophy is accompanied by activation of  $\text{Na}^+/\text{H}^+$  exchange and prevented by  $\text{Na}^+/\text{H}^+$  exchange inhibition. *Circulation Research* 87:1133–1140.

6. Boyer, M. J., and I. F. Tannock, 1992. Regulation of intracellular pH in tumor cell lines: influence of microenvironmental conditions. *Cancer Research* 52:4441–4447.
7. Hulikova, A., A. L. Harris, R. D. Vaughan-Jones, and P. Swietach, 2013. Regulation of intracellular pH in cancer cell lines under normoxia and hypoxia. *Journal of Cellular Physiology* 228:743–752.
8. Li, Y., C. Tu, H. Wang, D. N. Silverman, and S. C. Frost, 2011. Catalysis and pH control by membrane-associated carbonic anhydrase IX in MDA-MB-231 breast cancer cells. *Journal of Biological Chemistry* 286:15789–15796.
9. Hilvo, M., L. Baranauskiene, A. M. Salzano, A. Scaloni, D. Matulis, A. Innocenti, A. Scozzafava, S. M. Monti, A. Di Fiore, G. De Simone, et al., 2008. Biochemical characterization of CA IX: one of the most active carbonic anhydrase isozymes. *Journal of Biological Chemistry* 283:27799–27809.
10. Wykoff, C. C., N. J. Beasley, P. H. Watson, K. J. Turner, J. Pastorek, A. Sibtain, G. D. Wilson, H. Turley, K. L. Talks, P. H. Maxwell, et al., 2000. Hypoxia-inducible expression of tumor associated carbonic anhydrases. *Cancer Research* 60:7075–7083.

## Appendix: C++ code

We list the code used to carry out simulations.

```

1 // Author: Nicola Piasentin
2 // Master Thesis Project
3 // The control of acidity in tumour cells: a biophysical model
4 // GSL libraries needed
5
6 #include <iostream>
7 #include <iomanip>
8 #include <fstream>
9 #include <stdlib.h>
10 #include <math.h>
11 #include <stdio.h>
12 #include <gsl/gsl_vector.h>
13 #include <gsl/gsl_multiroots.h>
14
15 using namespace std;
16
17 ofstream outData, outDatapH;
18
19 double m_CO2_C_old, m_H_C_old, m_HCO3_C_old, m_CO2_c_old, m_H_c_old, m_HCO3_c_old;
20 const double Pi = M_PI;
21
22 // sensors
23 const double SensO2 = 1.0;
24 const double SensATP = 1.0;
25
26 struct cell_params
27 {
28     double MW_H;
29     double MW_CO2;
30     double MW_O2;
31     double MW_HCO3;
32     double MW_AcL;
33     double r_C;
34     double PM_CO2;
35     double gAcL;
36     double q_O2;
37     double k1;
38     double k2;
39     double VMAXAcL;
40     double K_mAcL;
41     double a2cH_slope;
42     double a2cH_thr;
43     double c2aH_slope;
44     double c2aH_thr;
45     double VMAXNHE;

```

```

46 double K_mNHE;
47 double a;
48 double l_NHE;
49 double pH0_NHE;
50 double VMAXTHCO3;
51 double K_mTHCO3;
52 double l_THCO3;
53 double pHe0_THCO3;
54 double g_THCO3;
55 double pHi0_THCO3;
56 double VMAXCA9;
57 double K_mCA9;
58 double d_CA9;
59 double V_c;
60 double dt;
61 };
62
63 int cell(const gsl_vector * x, void *params, gsl_vector * f)
64 {
65     double MW_H = ((struct cell_params *) params)->MW_H;
66     double MW_CO2 = ((struct cell_params *) params)->MW_CO2;
67     double MW_O2 = ((struct cell_params *) params)->MW_O2;
68     double MW_HCO3 = ((struct cell_params *) params)->MW_HCO3;
69     double MW_AcL = ((struct cell_params *) params)->MW_AcL;
70     double r_C = ((struct cell_params *) params)->r_C;
71     double PM_CO2 = ((struct cell_params *) params)->PM_CO2;
72     double gAcL = ((struct cell_params *) params)->gAcL;
73     double q_O2 = ((struct cell_params *) params)->q_O2;
74     double k1 = ((struct cell_params *) params)->k1;
75     double k2 = ((struct cell_params *) params)->k2;
76     double VMAXAcL = ((struct cell_params *) params)->VMAXAcL;
77     double K_mAcL = ((struct cell_params *) params)->K_mAcL;
78     double a2cH_slope = ((struct cell_params *) params)->a2cH_slope;
79     double a2cH_thr = ((struct cell_params *) params)->a2cH_thr;
80     double c2aH_slope = ((struct cell_params *) params)->c2aH_slope;
81     double c2aH_thr = ((struct cell_params *) params)->c2aH_thr;
82     double VMAXNHE = ((struct cell_params *) params)->VMAXNHE;
83     double K_mNHE = ((struct cell_params *) params)->K_mNHE;
84     double a = ((struct cell_params *) params)->a;
85     double l_NHE = ((struct cell_params *) params)->l_NHE;
86     double pH0_NHE = ((struct cell_params *) params)->pH0_NHE;
87     double VMAXTHCO3 = ((struct cell_params *) params)->VMAXTHCO3;
88     double K_mTHCO3 = ((struct cell_params *) params)->K_mTHCO3;
89     double l_THCO3 = ((struct cell_params *) params)->l_THCO3;
90     double pHe0_THCO3 = ((struct cell_params *) params)->pHe0_THCO3;
91     double g_THCO3 = ((struct cell_params *) params)->g_THCO3;
92     double pHi0_THCO3 = ((struct cell_params *) params)->pHi0_THCO3;
93     double VMAXCA9 = ((struct cell_params *) params)->VMAXCA9;
94     double K_mCA9 = ((struct cell_params *) params)->K_mCA9;
95     double d_CA9 = ((struct cell_params *) params)->d_CA9;
96     double V_c = ((struct cell_params *) params)->V_c;
97     double dt = ((struct cell_params *) params)->dt;
98
99     const double m_CO2_C = gsl_vector_get(x, 0);
100    const double m_H_C = gsl_vector_get(x, 1);
101    const double m_HCO3_C = gsl_vector_get(x, 2);
102    const double m_H_c = gsl_vector_get(x, 3);
103    const double m_HCO3_c = gsl_vector_get(x, 4);
104
105    // intracellular carbon dioxide dynamics
106    const double y0 = m_CO2_C - m_CO2_C_old - dt * (
107        // internal rate
108        SensO2 * q_O2 * MW_CO2 / MW_O2
109        // chemical equilibrium
110        - k1 * m_CO2_C + k2 * m_H_C * m_HCO3_C * 1000 * MW_CO2 / (4.0 / 3.0 * Pi * pow(r_C, 3.0) * MW_H *
111        MW_HCO3)
112        // diffusion
113        + PM_CO2 * (m_CO2_c_old / V_c - m_CO2_C / (4.0 / 3.0 * Pi * pow(r_C, 3.0))) * (4.0 * Pi * pow(r_C,
114        2.0))

```

```

113 );
114
115 // intracellular hydrogen dynamics
116 const double y1 = m_H_C - m_H_C_old - dt * (
117 // internal rate
118 SensATP * gAcL * MW_H / MW_AcL
119 // chemical equilibrium
120 + k1 * m_CO2_C * MW_H / MW_CO2 - k2 * m_H_C * m_HCO3_C * 1000 / (4.0 / 3.0 * Pi * pow(r_C, 3.0) *
MW_HCO3)
121 // nu_MCT_in->out
122 - (2.0 - tanh(c2aH_slope * (-log10(1000 * m_H_C / (4.0 / 3.0 * Pi * pow(r_C, 3.0) * MW_H))) -
c2aH_thr)) * VMAXAcL * MW_H / MW_AcL
123 * (4.0 * Pi * pow(r_C, 2.0)) * m_H_C / ((4.0 / 3.0 * Pi * pow(r_C, 3.0)) * K_mAcL * MW_H / MW_AcL +
m_H_C)
124 // nu_MCT_out->in
125 + (2.0 - tanh(a2cH_slope * (-log10(1000 * m_H_c / (V_c * MW_H))) - a2cH_thr)) * VMAXAcL * MW_H /
MW_AcL
126 * (4.0 * Pi * pow(r_C, 2.0)) * m_H_c / (V_c * K_mAcL * MW_H / MW_AcL + m_H_c)
127 // nu_NHE_in->out
128 - SensO2 * SensATP * 0.5 * (1.0 + ((-log10(1000 * m_H_c / (V_c * MW_H))) - pH0_NHE) / (1_NHE + abs
((-log10(1000 * m_H_c / (V_c * MW_H))) - pH0_NHE)))
129 * VMAXNHE * (4.0 * Pi * pow(r_C, 2.0)) * pow(m_H_C, a) / (pow(4.0 / 3.0 * Pi * pow(r_C, 3.0) * MW_H
* K_mNHE / 1000, a) + pow(m_H_C, a))
130 );
131
132 // intracellular bicarbonate ions dynamics
133 const double y2 = m_HCO3_C - m_HCO3_C_old - dt * (
134 // chemical equilibrium
135 k1 * MW_HCO3 / MW_CO2 * m_CO2_C - k2 * m_H_C * m_HCO3_C * 1000 / (4.0 / 3.0 * Pi * pow(r_C, 3.0) *
MW_H)
136 // nu_THCO3_out->in
137 + SensATP * (0.5) * (1.0 + tanh(l_THCO3 * (-log10(1000 * m_H_c / (V_c * MW_H))) - pHe0_THCO3)))
138 * (0.5) * (1.0 + tanh(g_THCO3 * (pHi0_THCO3 - (-log10(1000 * m_H_C / (4.0 / 3.0 * Pi * pow(r_C,
3.0) * MW_H))))))
139 * VMAXTHCO3 * (4.0 * Pi * pow(r_C, 2.0)) * m_HCO3_c / (V_c * K_mTHCO3 * MW_HCO3 / 1000 + m_HCO3_c)
140 );
141
142 // extracellular hydrogen dynamics
143 const double y3 = m_H_c - m_H_c_old - dt * (
144 // chemical equilibrium
145 k1 * m_CO2_c_old * MW_H / MW_CO2 - k2 * m_H_c * m_HCO3_c * 1000 / (V_c * MW_HCO3)
146 // nu_MCT_in->out
147 + (2.0 - tanh(c2aH_slope * (-log10(1000 * m_H_C / (4.0 / 3.0 * Pi * pow(r_C, 3.0) * MW_H))) -
c2aH_thr)) * VMAXAcL * MW_H / MW_AcL
148 * (4.0 * Pi * pow(r_C, 2.0)) * m_H_C / ((4.0 / 3.0 * Pi * pow(r_C, 3.0)) * K_mAcL * MW_H / MW_AcL +
m_H_C)
149 // nu_MCT_out->in
150 - (2.0 - tanh(a2cH_slope * (-log10(1000 * m_H_c / (V_c * MW_H))) - a2cH_thr)) * VMAXAcL * MW_H /
MW_AcL
151 * (4.0 * Pi * pow(r_C, 2.0)) * m_H_c / (V_c * K_mAcL * MW_H / MW_AcL + m_H_c)
152 // nu_NHE_in->out
153 + SensATP * SensO2 * 0.5 * (1.0 + ((-log10(1000 * m_H_c / (V_c * MW_H))) - pH0_NHE) / (1_NHE + abs
((-log10(1000 * m_H_c / (V_c * MW_H))) - pH0_NHE)))
154 * VMAXNHE * (4.0 * Pi * pow(r_C, 2.0)) * pow(m_H_C, a) / (pow(4.0 / 3.0 * Pi * pow(r_C, 3.0) * MW_H
* K_mNHE / 1000, a) + pow(m_H_C, a))
155 // nu_CA9
156 + (3.0 + 2.0 * tanh(-d_CA9 * SensO2)) * VMAXCA9 * 4.0 * Pi * pow(r_C, 2.0) * m_CO2_c_old / (V_c *
K_mCA9 * MW_CO2 / 1000 + m_CO2_c_old)
157 * MW_H / MW_CO2
158 );
159
160 // extracellular bicarbonate ions dynamics
161 const double y4 = m_HCO3_c - m_HCO3_c_old - dt * (
162 // chemical equilibrium
163 k1 * m_CO2_c_old * MW_HCO3 / MW_CO2 - k2 * m_H_c * m_HCO3_c * 1000 / (V_c * MW_H)
164 // nu_THCO3_out->in
165 - SensATP * (0.5) * (1.0 + tanh(l_THCO3 * (-log10(1000 * m_H_c / (V_c * MW_H))) - pHe0_THCO3)))
166 * (0.5) * (1.0 + tanh(g_THCO3 * (pHi0_THCO3 - (-log10(1000 * m_H_C / (4.0 / 3.0 * Pi * pow(r_C,
3.0) * MW_H))))))

```



```

167 * VMAXTHCO3 * (4.0 * Pi * pow(r_C, 2.0)) * m_HCO3_c / (V_c * K_mTHCO3 * MW_HCO3 / 1000 + m_HCO3_c)
168 // nu_CA9
169 + (3.0 + 2.0 * tanh(-d_CA9 * SensO2)) * VMAXCA9 * 4.0 * Pi * pow(r_C, 2.0) * m_CO2_c_old / (V_c *
170 K_mCA9 * MW_CO2 / 1000 + m_CO2_c_old)
171 * MW_HCO3 / MW_CO2
172 );
173 gsl_vector_set(f, 0, y0);
174 gsl_vector_set(f, 1, y1);
175 gsl_vector_set(f, 2, y2);
176 gsl_vector_set(f, 3, y3);
177 gsl_vector_set(f, 4, y4);
178
179 return GSL_SUCCESS;
180 }
181
182 int main(void)
183 {
184     const gsl_multiroot_fsolver_type *T;
185     gsl_multiroot_fsolver *s;
186
187     int status, time, j, k, perc;
188     double dt, pH; // , pH_temp;
189     size_t iter = 0;
190
191     // respect units!
192     const double MW_H = 1.0; // g/mol
193     const double MW_CO2 = 44.0; // g/mol
194     const double MW_O2 = 32.0; // g/mol
195     const double MW_HCO3 = 61.0; // g/mol
196     const double MW_AcL = 90.1; // g/mol
197     const double r_C = 6.55; // mim
198     const double PM_CO2 = 3.2 * pow(10, 4); // mim/s
199     const double gAcL = 3.8 * pow(10, -4); // pg/s
200     const double q_O2 = 3.5 * pow(10, -5); // pg/s
201     const double k1 = 0.144; // 1/s
202     const double k2 = 1.9 * pow(10, 5); // 1/(M*s)
203     const double VMAXAcL = 9.58 * pow(10, -5); // pg/(s*mim^2)
204     const double K_mAcL = 0.405 * pow(10, -3); // pg/mim^3
205     const double a2cH_slope = 1.5; // adim
206     const double a2cH_thr = 7.0; // adim
207     const double c2aH_slope = 1.5; // adim
208     const double c2aH_thr = 7.0; // adim
209     const double VMAXNHE = 5.15 * pow(10, -7); // pg/(s*mim^2)
210     const double K_mNHE = 0.196 * pow(10, -6); // pg/mim^3
211     const double a = 2.67; // adim
212     const double l_NHE = 0.076; // adim
213     const double pH0_NHE = 7.1; // adim
214     const double VMAXTHCO3 = 2.02 * pow(10, -5); // pg/(s*mim^2)
215     const double K_mTHCO3 = 7.38 * pow(10, -3); // pg/mim^3
216     const double l_THCO3 = 1.63; // adim
217     const double pHe0_THCO3 = 6.85; // adim
218     const double g_THCO3 = 4.2; // adim
219     const double pHi0_THCO3 = 6.90; // adim
220     const double VMAXCA9 = 9.47 * pow(10, -2); // pg/(s*mim^2)
221     const double K_mCA9 = 7.2 * pow(10, -3); // pg/mim^3
222     const double d_CA9 = 7.3; // adim
223     const double V_c = 1.0 * pow(10, 12); // mim^3
224     const double pKa = -log10(k1 / k2); // adim
225     const double pH_cell = 7.40; // adim
226
227     const int max_iter = 1000; // max number of iterations for Newton-Raphson
228
229     // input from the user
230     cout << "Time interval: " << endl;
231     cin >> dt;
232     cout << "Total integration time: " << endl;
233     cin >> time;
234     cout << "Starting pH: " << endl;

```

```

235 cin >> pH;
236
237 // starting conditions
238 m_CO2_C_old = 5.39 * pow(10.0, -5) * (4.0 / 3.0 * Pi * pow(r_C, 3.0));
239 m_H_C_old = pow(10.0, -pH_cell - 3.0) * (4.0 / 3.0 * Pi * pow(r_C, 3.0));
240 m_HCO3_C_old = MW_HCO3 / MW_CO2 * m_CO2_C_old * pow(10.0, pH_cell - pKa);
241
242 m_CO2_c_old = 5.39 * pow(10.0, -5) * V_c;
243 m_H_c_old = pow(10.0, -pH - 3.0) * V_c;
244 m_HCO3_c_old = MW_HCO3 / MW_CO2 * m_CO2_c_old * pow(10.0, pH - pKa);
245
246 // friendly reminder
247 cout << endl;
248 cout << "*****" << endl;
249 cout << endl;
250 cout << "Starting parameters" << endl;
251 cout << endl;
252 cout << "m_CO2_C (pg): " << m_CO2_C_old << endl;
253 cout << "m_H_C (pg): " << m_H_C_old << endl;
254 cout << "m_HCO3_C (pg): " << m_HCO3_C_old << endl;
255 cout << "m_CO2_c (pg): " << m_CO2_c_old << endl;
256 cout << "m_H_c (pg): " << m_H_c_old << endl;
257 cout << "m_HCO3_c (pg): " << m_HCO3_c_old << endl;
258 cout << "V_c (mim^3): " << V_c << endl;
259 cout << "dt: " << dt << endl;
260 cout << "steps: " << time << endl;
261 cout << "time: " << time * dt << endl;
262 cout << "starting pH: " << pH << endl;
263 cout << "sensO2: " << SensO2 << endl;
264 cout << "sensATP: " << SensATP << endl;
265 cout << endl;
266 cout << "*****" << endl;
267 cout << endl;
268 cout << "Running ..." << endl;
269 cout << endl;
270
271 // FYI
272 perc = 10;
273 cout << "-- completed at: 0 %" << endl;
274
275 const size_t n = 5;
276 struct cell_params cell_p = { MW_H, MW_CO2, MW_O2, MW_HCO3, MW_AcL, r_C, PM_CO2, gAcL, q_O2, k1, k2,
    VMAXAcL, K_mAcL, a2cH_slope,
277 a2cH_thr, c2aH_slope, c2aH_thr, VMAXNHE, K_mNHE, a, l_NHE, pH0_NHE, VMAXTHCO3, K_mTHCO3, l_THCO3,
278 pHe0_THCO3, g_THCO3, pHi0_THCO3, VMAXCA9, K_mCA9, d_CA9, V_c, dt };
279
280 gsl_multiroot_function cell_f = { &cell, n, &cell_p };
281
282 double x_init[n] = { m_CO2_C_old, m_H_C_old, m_HCO3_C_old, m_H_c_old, m_HCO3_c_old }; // starting
    point
283 gsl_vector *x = gsl_vector_alloc(n);
284
285 for (k = 0; k < n; k++)
286 {
287     gsl_vector_set(x, k, x_init[k]);
288 }
289
290 T = gsl_multiroot_fsolver_dnewton; // discrete Newton (discrete Jacobian)
291 s = gsl_multiroot_fsolver_alloc(T, n);
292
293 gsl_multiroot_function f = cell_f;
294
295 outData.open("cell_output.txt"); // output masses
296 outDatapH.open("cell_output_pH.txt"); // output pH
297
298 gsl_multiroot_fsolver_set(s, &f, x);
299
300 // output on masses file
301 outData << "# Starting parameters" << endl;

```

```

302 outData << endl;
303 outData << "# m_CO2_C (pg): " << m_CO2_C_old << endl;
304 outData << "# m_H_C (pg): " << m_H_C_old << endl;
305 outData << "# m_HCO3_C (pg): " << m_HCO3_C_old << endl;
306 outData << "# m_CO2_c (pg): " << m_CO2_c_old << endl;
307 outData << "# m_H_c (pg): " << m_H_c_old << endl;
308 outData << "# m_HCO3_c (pg): " << m_HCO3_c_old << endl;
309 outData << "# V_c (mim^3): " << V_c << endl;
310 outData << "# dt: " << dt << endl;
311 outData << "# steps: " << time << endl;
312 outData << "# time: " << time * dt << endl;
313 outData << "# starting pH: " << pH << endl;
314 outData << "# sensO2: " << SensO2 << endl;
315 outData << "# sensATP: " << SensATP << endl;
316 outData << endl;
317 outData << "# step\tm_CO2_C\tm_H_C\tm_HCO3_C\tm_H_c\tm_HCO3_c" << endl;
318 outData << endl;
319
320 // output on pH file
321 outDatapH << "# Starting parameters" << endl;
322 outDatapH << endl;
323 outDatapH << "# m_CO2_C (pg): " << m_CO2_C_old << endl;
324 outDatapH << "# m_H_C (pg): " << m_H_C_old << endl;
325 outDatapH << "# m_HCO3_C (pg): " << m_HCO3_C_old << endl;
326 outDatapH << "# m_CO2_c (pg): " << m_CO2_c_old << endl;
327 outDatapH << "# m_H_c (pg): " << m_H_c_old << endl;
328 outDatapH << "# m_HCO3_c (pg): " << m_HCO3_c_old << endl;
329 outDatapH << "# V_c (mim^3): " << V_c << endl;
330 outDatapH << "# dt: " << dt << endl;
331 outDatapH << "# steps: " << time << endl;
332 outDatapH << "# time: " << time * dt << endl;
333 outDatapH << "# starting pH: " << pH << endl;
334 outDatapH << "# sensO2: " << SensO2 << endl;
335 outDatapH << "# sensATP: " << SensATP << endl;
336 outDatapH << endl;
337 outDatapH << "# step\tpH_C\tpH_c\tpH_C HH\tpH_c HH" << endl;
338 outDatapH << endl;
339
340 // gonna need them
341 outData << fixed;
342 outData << setprecision(15);
343
344 outDatapH << fixed;
345 outDatapH << setprecision(15);
346
347 // first term
348 outData << "0" << "\t" << m_CO2_C_old << "\t" << m_H_C_old << "\t" << m_HCO3_C_old << "\t" <<
  m_H_c_old << "\t" << m_HCO3_c_old << endl;
349 outDatapH << "0" << "\t"
350 << -log10(1000 * m_H_C_old / (4.0 / 3.0 * Pi * pow(r_C, 3.0))) << "\t"
351 << -log10(1000 * m_H_c_old / V_c) << "\t" << log10((m_HCO3_C_old * MW_CO2 * k2) / (m_CO2_C_old *
  MW_HCO3 * k1))
352 << "\t" << log10((m_HCO3_c_old * MW_CO2 * k2) / (m_CO2_c_old * MW_HCO3 * k1)) << endl;
353
354 // starts the time
355 for (j = 1; j < time; j++)
356 {
357     iter = 0;
358
359     do
360     {
361         iter++;
362
363         status = gsl_multiroot_fsolver_iterate(s);
364
365         if (status) // check if solver is stuck
366             break;
367
368         status = gsl_multiroot_test_residual(s->f, 1e-6);

```

```

369     } while (status == GSL_CONTINUE && iter < max_iter);
370
371     // lazy...
372     if (j * 100 / time == perc)
373     {
374         cout << "-- completed at: " << perc << " %" << endl;
375         perc = perc + 10;
376     }
377
378     // output control
379     if (j % 100 == 0)
380     {
381
382         outData << j * dt << "\t" << gsl_vector_get(s->x, 0) << "\t" << gsl_vector_get(s->x, 1) << "\t"
383         << gsl_vector_get(s->x, 2)
384         << "\t" << gsl_vector_get(s->x, 3) << "\t" << gsl_vector_get(s->x, 4) << endl;
385
386         outDatapH << j * dt << "\t"
387         << -log10(1000 * gsl_vector_get(s->x, 1) / (4.0 / 3.0 * Pi * pow(r_C, 3.0))) << "\t"
388         << -log10(1000 * gsl_vector_get(s->x, 3) / V_c)
389         << "\t" << log10((gsl_vector_get(s->x, 2) * MW_CO2 * k2) / (gsl_vector_get(s->x, 0) * MW_HCO3 *
390         k1))
391         << "\t" << log10((gsl_vector_get(s->x, 4) * MW_CO2 * k2) / (m_CO2_c_old * MW_HCO3 * k1)) <<
392         endl;
393     }
394
395     x_init[0] = gsl_vector_get(s->x, 0);
396     x_init[1] = gsl_vector_get(s->x, 1);
397     x_init[2] = gsl_vector_get(s->x, 2);
398     x_init[3] = gsl_vector_get(s->x, 3);
399     x_init[4] = gsl_vector_get(s->x, 4);
400
401     m_CO2_C_old = x_init[0];
402     m_H_C_old = x_init[1];
403     m_HCO3_C_old = x_init[2];
404     m_H_c_old = x_init[3];
405     m_HCO3_c_old = x_init[4];
406
407     // pH drop at time j*dt
408     /*
409     if (j == 200000)
410     {
411         m_H_C_old = m_H_C_old * pow(10.0, 1.0);
412         pH_temp = -log10(m_H_C_old * 1000.0 / (4.0 / 3.0 * Pi * pow(r_C, 3.0) * MW_H));
413         m_HCO3_C_old = MW_HCO3 / MW_CO2 * m_CO2_C_old * pow(10.0, pH_temp - pKa);
414         x_init[1] = m_H_C_old;
415         x_init[2] = m_HCO3_C_old;
416     }
417     */
418
419     for (k = 0; k < n; k++)
420     {
421         gsl_vector_set(x, k, x_init[k]);
422     }
423
424     gsl_multiroot_fsolver_set(s, &f, x);
425 }
426
427 // closing
428 cout << "-- completed at: " << perc << " %" << endl;
429 cout << "-- done!" << endl;
430 cout << endl;
431
432 gsl_multiroot_fsolver_free(s);
433 gsl_vector_free(x);
434

```

```
435 outData.close();
436 outDatapH.close();
437
438 // because windows
439 system("pause");
440
441 return 0;
442
443 }
```
